# Supplementary material
Source: MDPI journal article supplement (https://www.mdpi.com/2071-1050/15/9/7492)
Supplement: s1 [file s1 › sustainability-2363783-supplementary.pdf]

# Supplemental Material for

## Chemically Catalyzed Phytoextraction for Sustainable Cleanup of Soil Lead Contamination in A Community Garden in Jersey City, New Jersey

Zhiming Zhang, Dibyendu Sarkar, Frances Levy and Rupali Datta

**Table S1.** Properties of the composite soil samples in the community garden.

| pH              | Electrical Conductivity ( $\mu\text{S}/\text{cm}$ ) | Organic Matter (%) | Total Pb (mg/kg) | Total Al (mg/kg) | Total Fe (mg/kg)   |
|-----------------|-----------------------------------------------------|--------------------|------------------|------------------|--------------------|
| $6.04 \pm 0.06$ | $317 \pm 8$                                         | $13.4 \pm 0.61$    | $906 \pm 73$     | $9,611 \pm 263$  | $13,517 \pm 2,697$ |

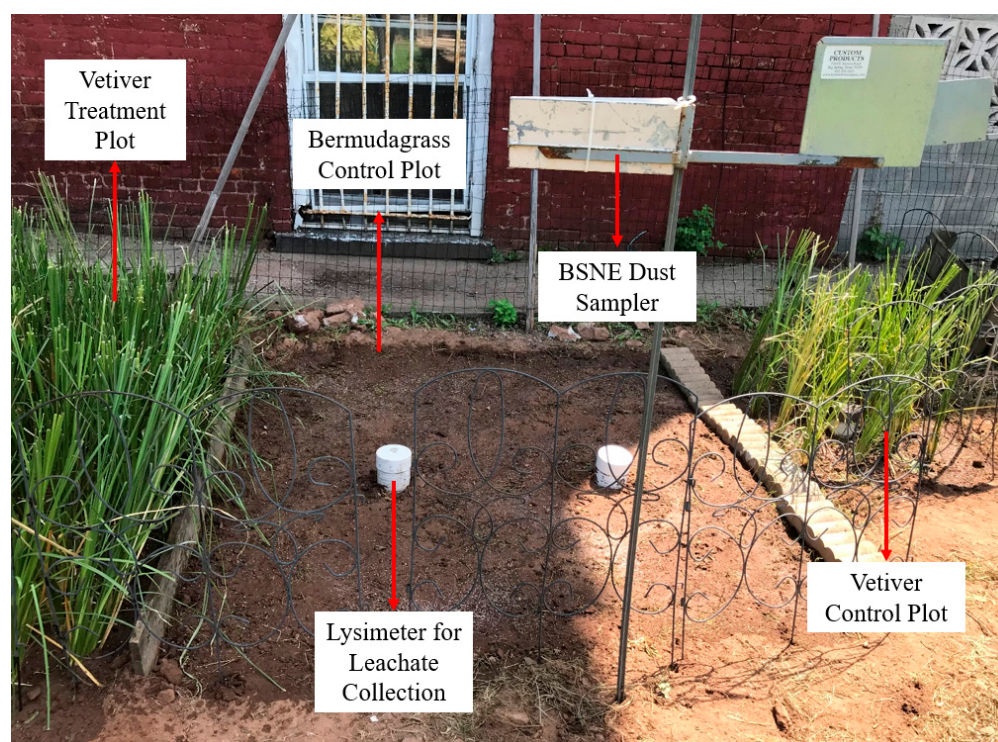

**Figure S1.** Plot settings for the field study experiments.

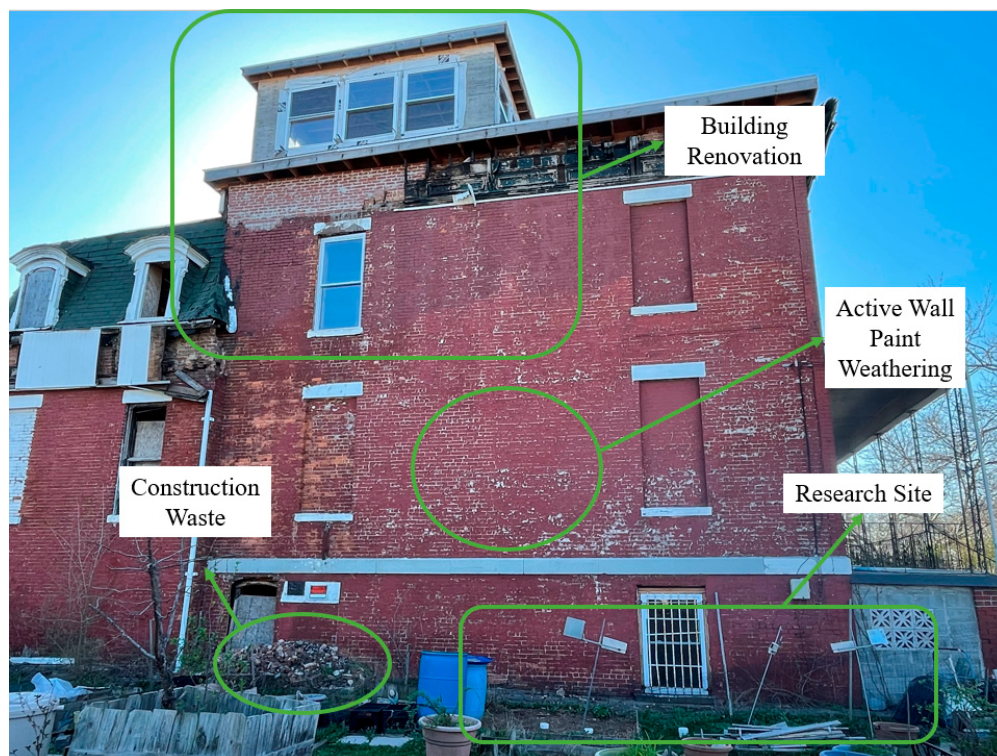

**Figure S2.** Overall picture of the field site.

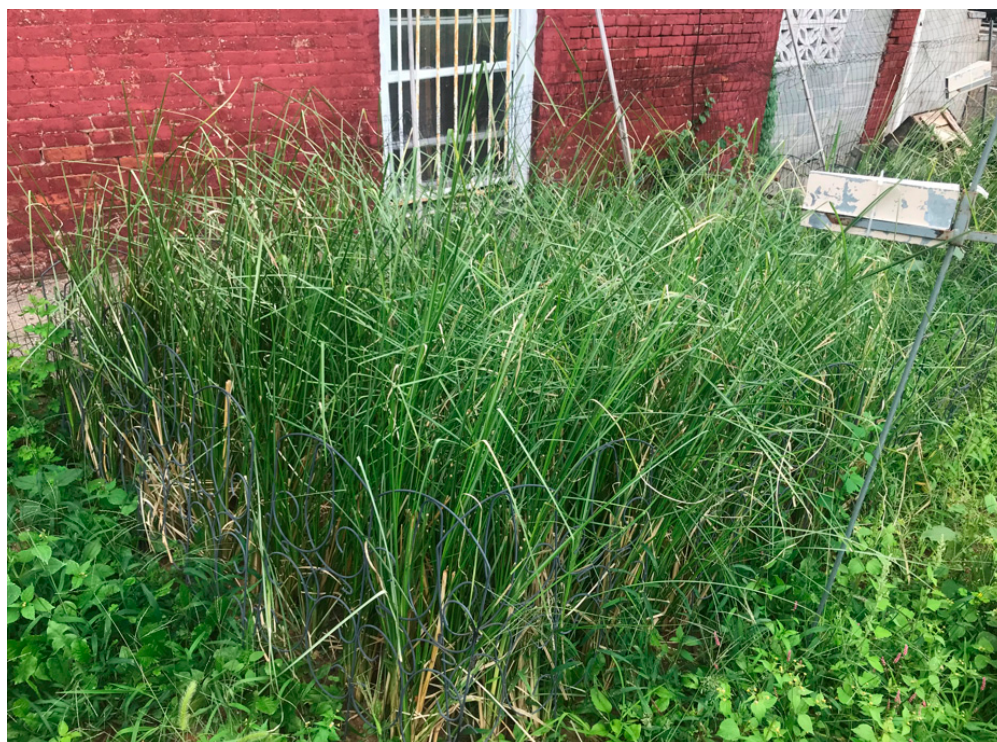

**Figure S3.** Vetiver grass growth in the vetiver treatment plot in the community garden.
